# Supplementary material for: The aligned core–sheath nanofibers with electrical conductivity for neural tissue engineering
Source: Royal Society of Chemistry journal article supplement (doi:10.1039/c4tb01185f), 2014-09-12
Supplement: c4tb01185f1.pdf [file c4tb01185f1.pdf]

## Electronic Supplementary Information

### **The Aligned Core-Sheath Nanofibers with Electrical Conductivity for Neural Tissue Engineering†**

Jianguang Zhang<sup>a</sup>, Kexin Qiu<sup>a,b</sup>, Binbin Sun<sup>a</sup>, Jun Fang<sup>a,b</sup>, Kuihua Zhang<sup>c</sup>, Hany A. El-Hamshary<sup>d</sup>, Salem S. Al-Deyab<sup>d</sup>, Xiumei Mo<sup>a,b\*</sup>

<sup>a</sup>College of Chemistry, Chemical Engineering and Biotechnology, Donghua University, Shanghai, 201620, People's Republic of China

<sup>b</sup>State Key Laboratory for Modification of Chemical Fibers and Polymer Materials, College of Materials Science and Engineering, Donghua University, Shanghai, 201620, People's Republic of China

<sup>c</sup>Department of Polymer Materials, College of Materials and Textile Engineering, Jiaxing University, Zhejiang, 314001, People's Republic of China

<sup>d</sup>Department of Chemistry, College of Science, King Saud University, Riyadh 11451, Kingdom of Saudi Arabia

\* Corresponding author at: College of Chemistry, Chemical Engineering and Biotechnology, Donghua University, 2999 North Renmin Road, Shanghai 201620, P. R. China. E-mail address: [xmm@dhu.edu.cn](mailto:xmm@dhu.edu.cn) (X. M. Mo)

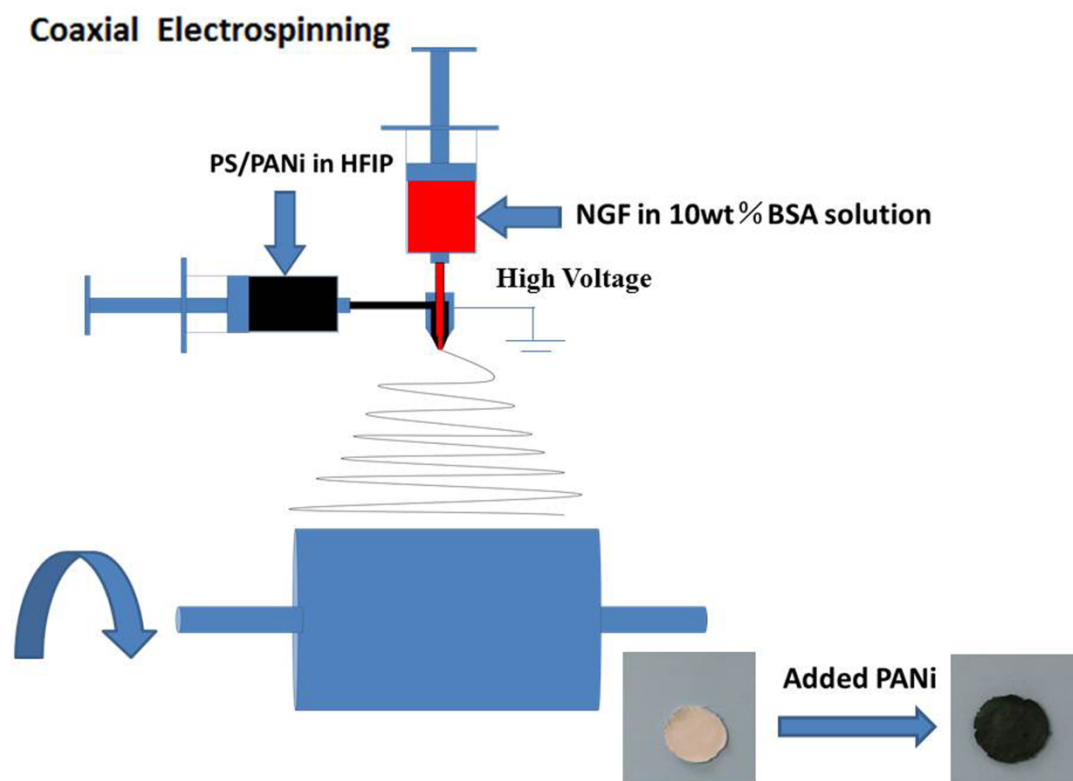

**Fig.S1** Schematic diagram of coaxial electrospinning nanofiber processing for core-shell aligned PS/PANi nanofibrous mesh and the color of the mesh without and with PANi.

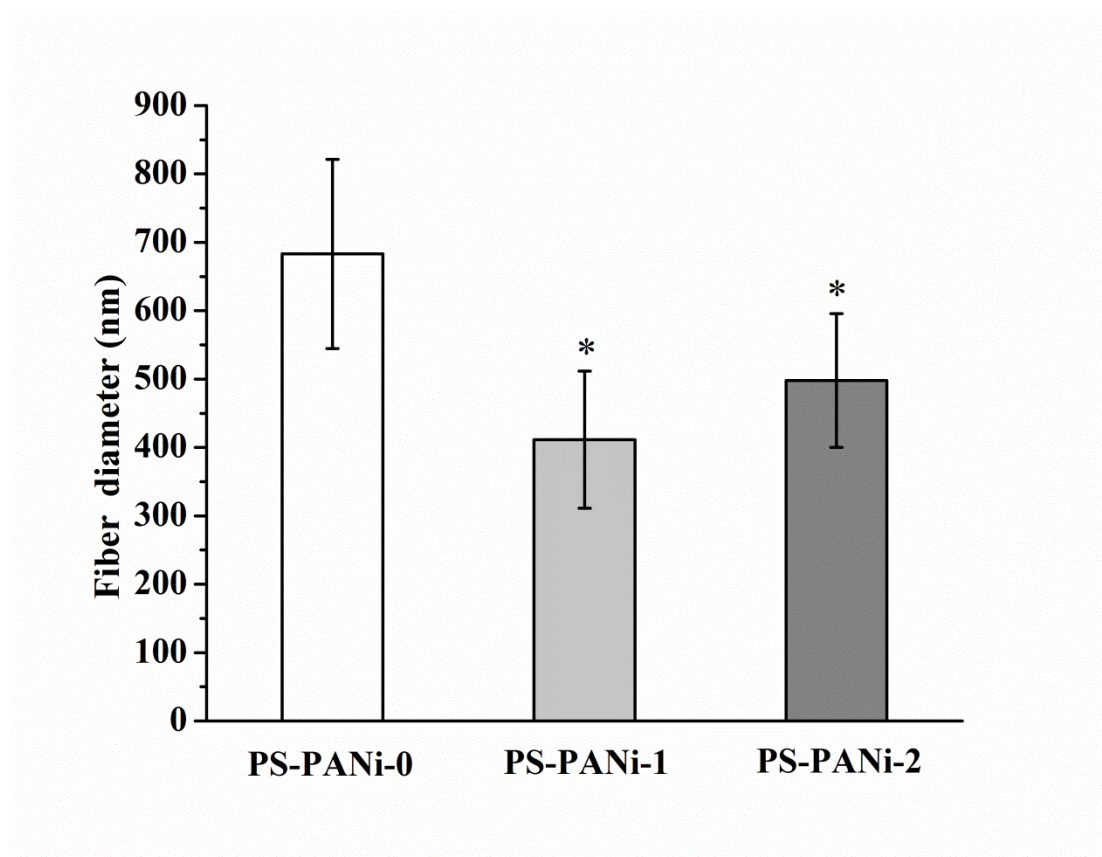

**Fig.S2** The average diameter of PS/PANi nanofibers (\*= significantly different in comparison with PS-PANi-0,  $P < 0.05$ ,  $n=100$ ).
